# Supplementary material for: Toll‐like receptor 3 signal augments radiation‐induced tumor growth retardation in a murine model
Source: PubMed Central journal article supplement — Cancer Sci. 2018 Mar 25;109(4):956–65. doi: 10.1111/cas.13543 (PMC5891207; doi:10.1111/cas.13543), 2018-03-25
Supplement: CAS-109-956-s001.pdf [file CAS-109-956-s001.pdf]

**Table S1. Antibodies used in this study.**

| Antibody (and related reagent)                                        | Clone    | Supplier      |
|-----------------------------------------------------------------------|----------|---------------|
| FITC-anti-mouse CD3 $\epsilon$                                        | 145-2C11 | Biolegend     |
| PE/Cy7-anti-mouse CD3                                                 | 17A2     |               |
| AlexaFluor700-anti-mouse CD8 $\alpha$                                 | 53-6.7   |               |
| APC-anti-mouse CD8 $\alpha$                                           |          |               |
| PE/Cy7-anti-mouse/human CD11b                                         | M1/70    |               |
| APC-anti-mouse CD11c                                                  | N418     |               |
| PE/Cy7-anti-mouse CD11c                                               |          |               |
| APC-anti-mouse/human CD44                                             | IM7      |               |
| AlexaFluor700-anti-mouse CD45.2                                       | 104      |               |
| APC/Cy7-anti-mouse CD45.2                                             | 30-F11   |               |
| FITC-anti-mouse CD62L                                                 | MEL-14   |               |
| APC-anti-mouse F4/80                                                  | BM8      |               |
| FITC-anti-mouse F4/80                                                 |          |               |
| APC-anti-mouse Ly6G/Ly6C (Gr-1)                                       | RB6-8C5  |               |
| PE-anti-mouse TNF- $\alpha$                                           | MP6-XT22 |               |
| Purified anti-mouse CD16/32 *used in Fc blocking                      | 93       |               |
| PE-Rat IgG1, $\kappa$ *Isotype control of PE-anti-mouse TNF- $\alpha$ | BM2a     | eBioscience   |
| T-select H-2Kb OVA Tetramer-SIINFEKL-PE                               |          | MBL           |
| ViaProbe *used for excluding dead cells                               |          | BD Bioscience |

**Table S2. Primers for RT-qPCR used in this study.**

|               | Forward                       | Reverse                         |
|---------------|-------------------------------|---------------------------------|
| <i>Ccl3</i>   | 5'-TTGAAACCAGCAGCCTTTGC-3'    | 5'-CTTTGGAGTCAGCGCAGATCT-3'     |
| <i>Ccl4</i>   | 5'-GCCCTCTCTCCTCTTGCT-3'      | 5'-GGAGGGTCAGAGCCATT-3'         |
| <i>Ccl5</i>   | 5'-TGCCACGTC AAGGAGTATTT-3'   | 5'-TCGAGTGACAAACACGACTGC-3'     |
| <i>Cxcl9</i>  | 5'-GATAAGGAATGCACGATGCTC-3'   | 5'-TCTCCGTTCTTCAGTGTAGCAA-3'    |
| <i>Cxcl10</i> | 5'-GTGTTGAGATCATTGCCACGA-3'   | 5'-GCGTGGCTTCACTCCAGTTAA-3'     |
| <i>Cxcl11</i> | 5'-GGCTGCGACAAAGTTGAAGTGA-3'  | 5'-TCCTGGCACAGAGTTCTTATTGGAG-3' |
| <i>Fasl</i>   | 5'-TTTCAGAGGGTGTACTGGGG-3'    | 5'-TGGTTGGAATGGGATTAGGA-3'      |
| <i>Gapdh</i>  | 5'-GCCTGGAGAAACCTGCCA-3'      | 5'-CCCTCAGATGCCTGCTTCA-3'       |
| <i>Gzmb</i>   | 5'-GCCTGGAGAAACCTGCCA-3'      | 5'-CCCTCAGATGCCTGCTTCA-3'       |
| <i>Ifnb</i>   | 5'-CCAGTCCAAGAAAGGACGA-3'     | 5'-CGCCCTGTAGGTGAGGTTGAT-3'     |
| <i>Ifng</i>   | 5'-GATATCTGGAGGAAGTGGCAAAG-3' | 5'-AGAGATAATCTGGCTCTGCAGGAT-3'  |
| <i>Prf1</i>   | 5'-CAAGTAGCCAATTTTGCAGC-3'    | 5'-GGCGAAAAGTGTACATGCGAC-3'     |
| <i>Tbx21</i>  | 5'-CAACCAGCACCAGACAGAGA-3'    | 5'-CCACATCCACAAACATCCTG-3'      |

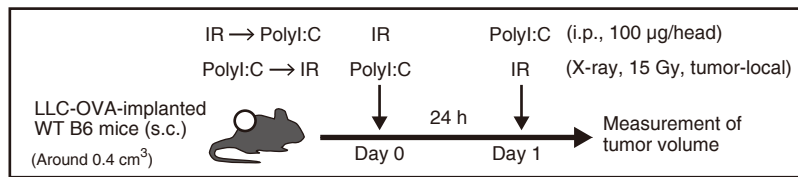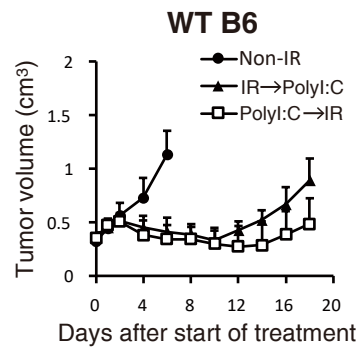

**Figure S1. Pre-treatment of polyI:C with IR was more efficient than post-treatment in tumor regression.** LLC-OVA-implanted WT B6 mice were intraperitoneally injected with polyI:C (100 µg/head) or performed 15 Gy of ionizing radiation (IR) when tumor volume reached around 0.4 cm<sup>3</sup>. After 24 h, polyI:C administration or IR was performed following the time table in this figure. *n* = 3-4 mice per group. Data are shown as average (SD) tumor size.

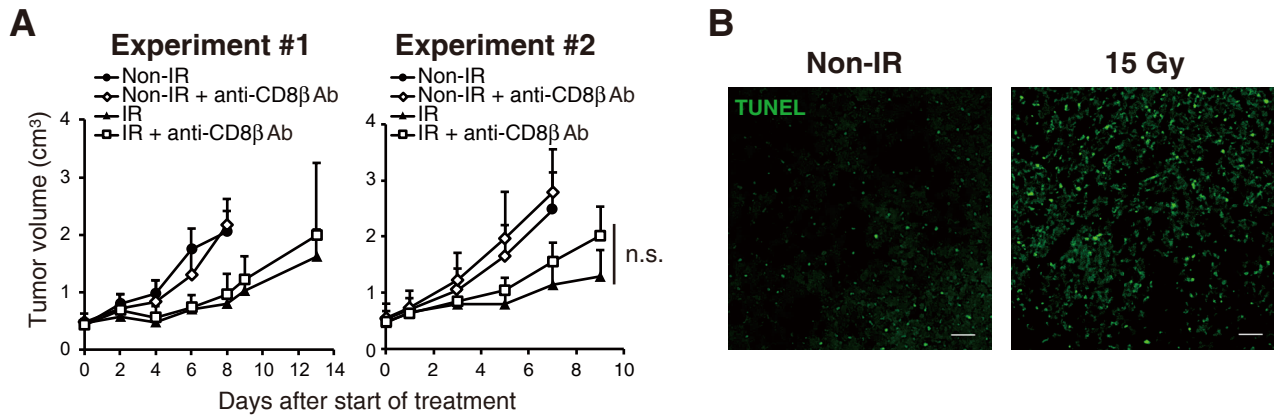

**Figure S2. IR damaged tumor cells and suppressed tumor growth independent of CTLs.** (A) Growth of LLC-OVA tumor on WT B6 mice with or without anti-CD8 $\beta$  antibody (Ab) treatment. Anti-CD8 $\beta$  Ab was injected into tumor-bearing mice 24-48 h before 15 Gy of ionizing radiation (IR). Additional Ab injection was performed on 5-6 days after irradiation. Similar two experiments were performed. Data are shown as average (SD) tumor size. n.s., not significant. In experiment #1,  $n = 3$  mice per group. In experiment #2,  $n = 3-5$  mice per group. (B) LLC-OVA-implanted mice were locally irradiated with 15 Gy of X-ray on tumor site. After 48 h, tumors were harvested, fixed with 10% neutralized buffered formalin at 4 °C for 3 h. Then, samples were equilibrated with 15% and 30% sucrose/PBS, mounted in O.C.T. compound (Sakura Finetek Japan), and frozen. Blocks were sliced and stained with the In Situ Cell Death Detection Kit, Fluorescein (Roche). Specimens were analyzed using BZ-9000 (KEYENCE). Scale bars, 50  $\mu$ m. The pictures are representative of two independent experiments.

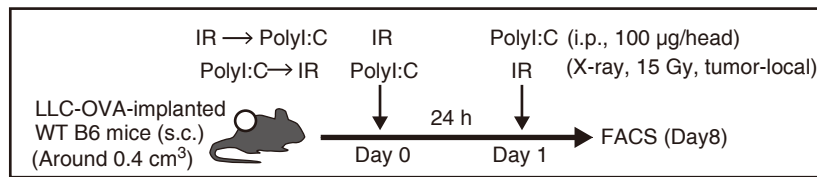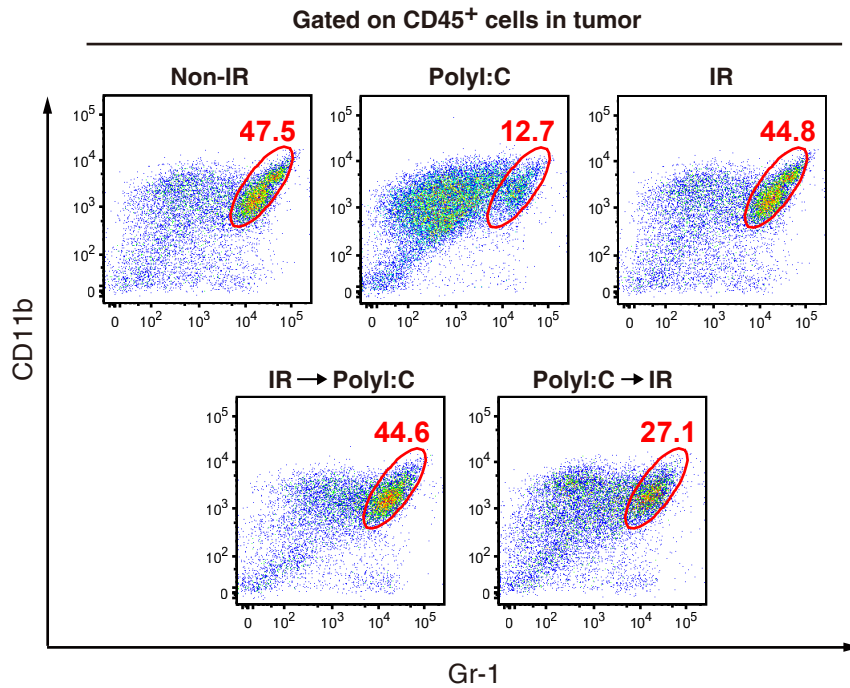

**Figure S3. Frequency of intratumor CD11b<sup>+</sup> Gr-1<sup>+</sup> cells was different in pre- or post- polyI:C injection with radiation.** LLC-OVA-implanted WT B6 mice were treated with polyI:C and IR following the time table in this figure. Tumors were harvested on day 8 after the start of treatment and FACS analysis was performed. Plots are representative results of two with similar outcomes.

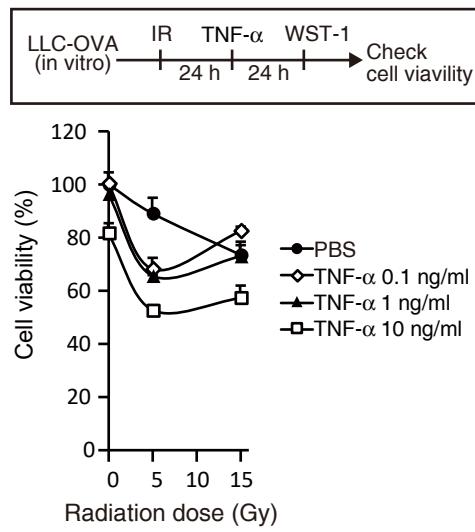

**Figure S4. TNF- $\alpha$  post-treatment decreased LLC-OVA cell viability combinatry with IR.** LLC-OVA cells were subjected to 15 Gy of IR and 24 h later, TNF- $\alpha$  was treated . After 24 h culture, cell viability was assessed by WST-1 assay.  $n = 3$ . Data represent the means (SD).

Yoshida et.al.
